# Supplementary material
Source: MDPI journal article supplement (https://www.mdpi.com/2075-163X/8/2/36)
Supplement: s1 [file s1]

# Supplementary Materials: Different Erionite Species Bind Iron into the Structure: A Potential Explanation for Fibrous Erionite Toxicity

Alessandro Pacella, Carlo Cremisini, Elisa Nardi, Maria Rita Montereali, Ida Pettiti, Matteo Giordani, Michele Mattioli and Paolo Ballirano

**Table S1.** Experimental details and miscellaneous data of the Rietveld refinements. Statistical parameters as defined in Young [76].

| Experimental details                          |                                                |                |
|-----------------------------------------------|------------------------------------------------|----------------|
| Instrument                                    | Bruker AXS D8 Advance                          |                |
| Radiation                                     | CuK $\alpha$                                   |                |
| Detector                                      | PSD VÅNTEC-1                                   |                |
| Sample mount                                  | Rotating capillary (60 r/min)                  |                |
| Incident beam optics                          | 60 mm focusing multilayer (Göbel) X-ray mirror |                |
| Angular range ( $^{\circ}2\theta$ )           | 5-145                                          |                |
| ( $\sin / \lambda$ )max ( $\text{\AA}^{-1}$ ) | 0.619                                          |                |
| Step size ( $^{\circ}2\theta$ )               | 0.022                                          |                |
| Counting time (s)                             | 10                                             |                |
| Miscellaneous data                            | Samples                                        |                |
|                                               | Pristine                                       | Fe (II) loaded |
| Calcite (wt %)                                | 1.55(9)                                        | -              |
| Quartz (wt %)                                 | 0.63(2)                                        | 0.556(18)      |
| RBragg (%)                                    | 0.23                                           | 0.14           |
| RP (%)                                        | 1.49                                           | 0.97           |
| RWP (%)                                       | 2.04                                           | 1.40           |

**Table S2.** Comparison of cell parameters and volume,  $\epsilon_0$  microstrain, and principal ellipsoid radii of pristine and Fe (II) loaded samples. For comparison purposes data of woolly erionite-Na from Durkee, Oregon [61] are reported.

| Sample                        | $a$ (Å)    | $c$ (Å)    | $c/a$  | Volume (Å <sup>3</sup> ) | $\epsilon_0$ | $r_a$ (nm) | $r_c$ (nm) | $r_c/r_a$ |
|-------------------------------|------------|------------|--------|--------------------------|--------------|------------|------------|-----------|
| Pristine                      | 13.2560(4) | 15.0473(5) | 1.1351 | 2289.90(15)              | 0.193(5)     | 18.6(2)    | 51.1(18)   | 2.75      |
| 500 $\mu$ M FeCl <sub>2</sub> | 13.2627(4) | 15.0409(5) | 1.1341 | 2291.24(16)              | 0.168(5)     | 15.19(18)  | 51.3(2)    | 3.38      |
| Woolly erionite-Na            | 13.2357(5) | 15.0652(6) | 1.1382 | 2285.6(2)                | 0.200(7)     | 15.5(2)    | 79(5)      | 5.10      |

**Table S3.** Si, Al partition at T1 and T2 sites and calculation of the R ratio following Jones [72].

| Sample                        | <T1-O> | <T2-O> | T1                                     | T2                                    | T                                      | R     |
|-------------------------------|--------|--------|----------------------------------------|---------------------------------------|----------------------------------------|-------|
| Pristine                      | 1.6279 | 1.6465 | Si <sub>20.28</sub> Al <sub>3.72</sub> | Si <sub>8.70</sub> Al <sub>3.30</sub> | Si <sub>28.98</sub> Al <sub>7.02</sub> | 0.805 |
| 500 $\mu$ M FeCl <sub>2</sub> | 1.6255 | 1.6493 | Si <sub>20.64</sub> Al <sub>3.36</sub> | Si <sub>8.49</sub> Al <sub>3.51</sub> | Si <sub>29.13</sub> Al <sub>6.87</sub> | 0.809 |
